# Supplementary material for: Integrating anaerobic digestion and slow pyrolysis improves the product portfolio of a cocoa waste biorefinery
Source: Royal Society of Chemistry journal article supplement (doi:10.1039/d0se00689k), 2020-01-01
Supplement: d0se00689k1.pdf [file d0se00689k1.pdf]

Supplementary Information for:  
Integrating anaerobic digestion and slow pyrolysis improves the  
product portfolio of a cocoa waste biorefinery

Stef Ghysels<sup>b,c,a</sup>, Nayaret Acosta<sup>b,a</sup>, Adriana Estrada<sup>b</sup>, Mehmet Pala<sup>b</sup>, Jo De Vrieze<sup>c</sup>, Frederik Ronsse<sup>b</sup>, Korneel Rabaey<sup>c,\*</sup>

*<sup>a</sup>These authors contributed equally*

*<sup>b</sup>Thermochemical Conversion of Biomass Research Group, Department of Green Chemistry and Technology, Ghent University, Coupure Links 653, 9000 Ghent, Belgium.*

*<sup>c</sup>Centre for Microbial Ecology and Technology (CMET), Ghent University, Coupure Links 653, B-9000 Gent, Belgium*

---

---

---

\*Korneel.Rabaey@UGent.be

## **Appendix A. Calibration of GC-MS detected compounds**

The GC-MS was calibrated with a set of reference compounds typically found in pyrolysis liquids, which were quantified directly. Chemical compounds for which the GC-MS was not calibrated were quantified by using the response factors from calibrated compounds having structural similarity or which belong to the same chemical group (Mohabeer et al., 2017).

Table A.1: Classification of the quantified chemical compounds in the pyrolysis liquids according to their chemical group and indication of the applied response factors used for quantification of the chemical compounds. RT: retention time (minutes).

| Chemical group                | Compounds in the chemical group quantified with this response factor | RT in minutes        | Reference compound for calibration | Resonse factor of reference compound |
|-------------------------------|----------------------------------------------------------------------|----------------------|------------------------------------|--------------------------------------|
| Light oxygenates              | Acetic acid                                                          | 9.10                 | Acetic acid                        | 0.41                                 |
|                               | Butanoic acid                                                        | 20.96                |                                    |                                      |
|                               | Propanoic acid                                                       | 12.20                |                                    |                                      |
|                               | 1-Hydroxy-2-propanone                                                | 10.24                | 1-Hydroxy-2-propanone              | 0.44                                 |
|                               | 2-Furanmethanol                                                      | 17.23                | Furfural                           | 0.61                                 |
|                               | 4-Hydroxybutanoic acid                                               | 21.04                | 3-Methyl-1,2-cyclopentanedione     | 0.67                                 |
| 2-Cyclopenten-1-one derivates | 2-Cyclopenten-1-one, 2-methyl-                                       | 20.8; 17.62; 24.25   | 3-Methyl-1,2-cyclopentanedione     | 0.67                                 |
|                               | 2-Cyclopenten-1-one, 3-methyl-                                       |                      |                                    |                                      |
|                               | 2-Cyclopenten-1-one, 3-(1-methylethyl)-                              |                      |                                    |                                      |
|                               | 2-Cyclopenten-1-one, 2,3-dimethyl-                                   | 21.21; 22.54         |                                    |                                      |
|                               | 2-Cyclopenten-1-one, 3,4-dimethyl-                                   |                      |                                    |                                      |
|                               | 2-Cyclopenten-1-one, 2,3,4-trimethyl-                                | 22.79                |                                    |                                      |
| Phenol                        | Phenol                                                               | 23.41                | Phenol                             | 1.74                                 |
| Alkyl phenols                 | Phenol, 4-ethyl-                                                     | 27.08; 28.33; 28.39  | Phenol                             | 1.74                                 |
|                               | Phenol, 3-ethyl-                                                     |                      |                                    |                                      |
|                               | Phenol, 2-ethyl-                                                     |                      |                                    |                                      |
|                               | Phenol, 4-methyl-                                                    | 24.83; 24.92; 25.86  |                                    |                                      |
|                               | Phenol, 3-methyl-                                                    |                      |                                    |                                      |
|                               | Phenol, 2-methyl-                                                    |                      |                                    |                                      |
|                               | Phenol, 2,6-dimethyl-                                                | 27,21; 28,24; 29,06; |                                    |                                      |
|                               | Phenol, 2,5-dimethyl-                                                |                      |                                    |                                      |
|                               | Phenol, 2,3-dimethyl-                                                |                      |                                    |                                      |
|                               | Phenol,3,4-dimethyl-                                                 |                      |                                    |                                      |
| Phenol, 2-ethyl-6-methyl-     | 29.15; 29.53                                                         |                      |                                    |                                      |
| Phenol, 2-ethyl-5-methyl      |                                                                      |                      |                                    |                                      |
| Phenol, 2-ethyl-4-metyl       |                                                                      |                      |                                    |                                      |
|                               | Phenol, 2,4,6-trimethyl-                                             | 30.41                |                                    |                                      |
|                               | Phenol, 4-propyl-                                                    | 30.67                |                                    |                                      |
| Methoxy phenols               | 2-Methoxyphenol                                                      | 24.00                | 2-Methoxyphenol                    | 1.49                                 |
|                               | 2,6-Dimethoxyphenol                                                  | 32.20                |                                    |                                      |
| Methoxyalkyl phenols          | Phenol, 4-ethyl-2-methoxy-                                           | 29.29                | 2-Methoxy-4-methyl phenol          | 1.53                                 |
|                               | Phenol, 2-methoxy-4-propyl-                                          | 31.53                |                                    |                                      |
|                               | Phenol, 2,6-dimethoxy-4-(2-propenyl)-                                | 30.26                |                                    |                                      |
|                               | 2-Methoxy-4-vinylphenol                                              | 30.86                |                                    |                                      |

|                      |                                                                                    |       |                 |      |
|----------------------|------------------------------------------------------------------------------------|-------|-----------------|------|
|                      | Phenol, 2-methoxy-4-methyl-                                                        | 27.00 |                 |      |
|                      | Phenol, 2-methoxy-4-(1-propenyl)-, (Z)-                                            | 34.23 |                 |      |
| Substituted benzenes | 1,2,4-Trimethoxybenzene                                                            | 34.51 | 2-Methoxyphenol | 1.49 |
|                      | Benzenepropanenitrile                                                              | 30.16 | Phenol          | 1.74 |
|                      | Indole                                                                             | 32.42 | Naphtalene      | 2.19 |
| lipid derivatives    | 3-Nonen-2-ol, (E)-                                                                 | 25.38 |                 |      |
|                      | Overlapping peaks, mostly Tridecanoic acid,<br>methyl ester; Methyl tetradecanoate | 42-47 | Ethylene glycol | 0.53 |
|                      | Tetradecane                                                                        | 30.85 |                 |      |
|                      | Hexadecane                                                                         | 33.24 | Benzene         | 2.25 |
|                      | Pentadecane                                                                        | 35.52 |                 |      |

## Appendix B. Composition of cocoa pods aqueous phase pyrolysis liquids

The composition of the aqueous phase from pyrolysis of raw coco pod husks is shown in Figure B.1.

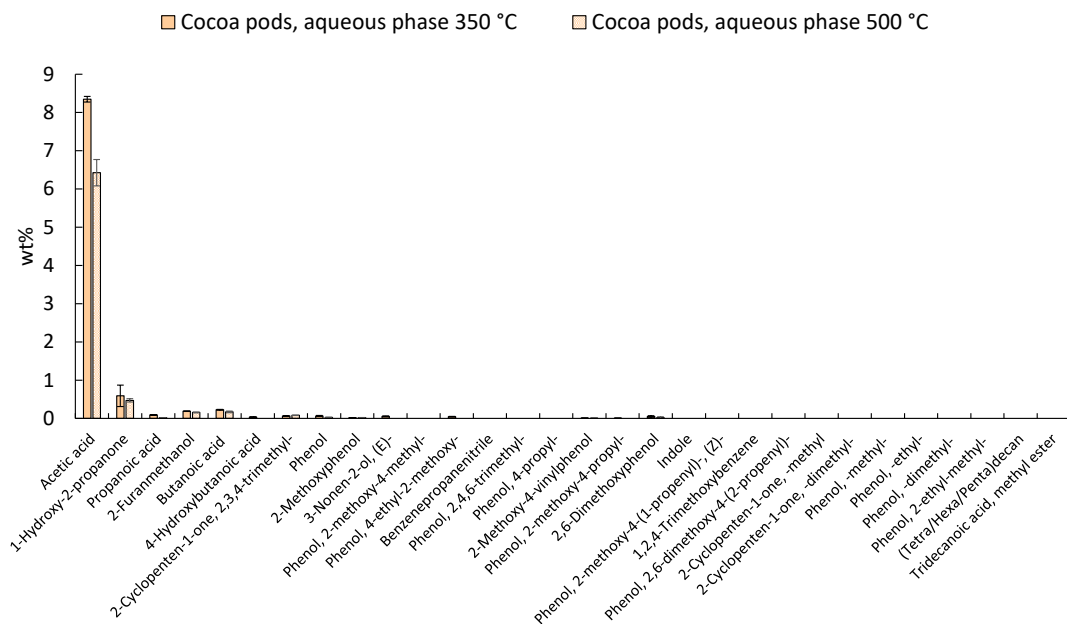

Figure B.1: Composition of the aqueous phase pyrolysis liquids in wt.% on liquid-basis, determined through GC-MS analysis.

## Appendix C. Detailed composition of all organic phase pyrolysis liquids

The concentration of individual compounds present in all organic phase pyrolysis liquids is shown in Figure C.2.

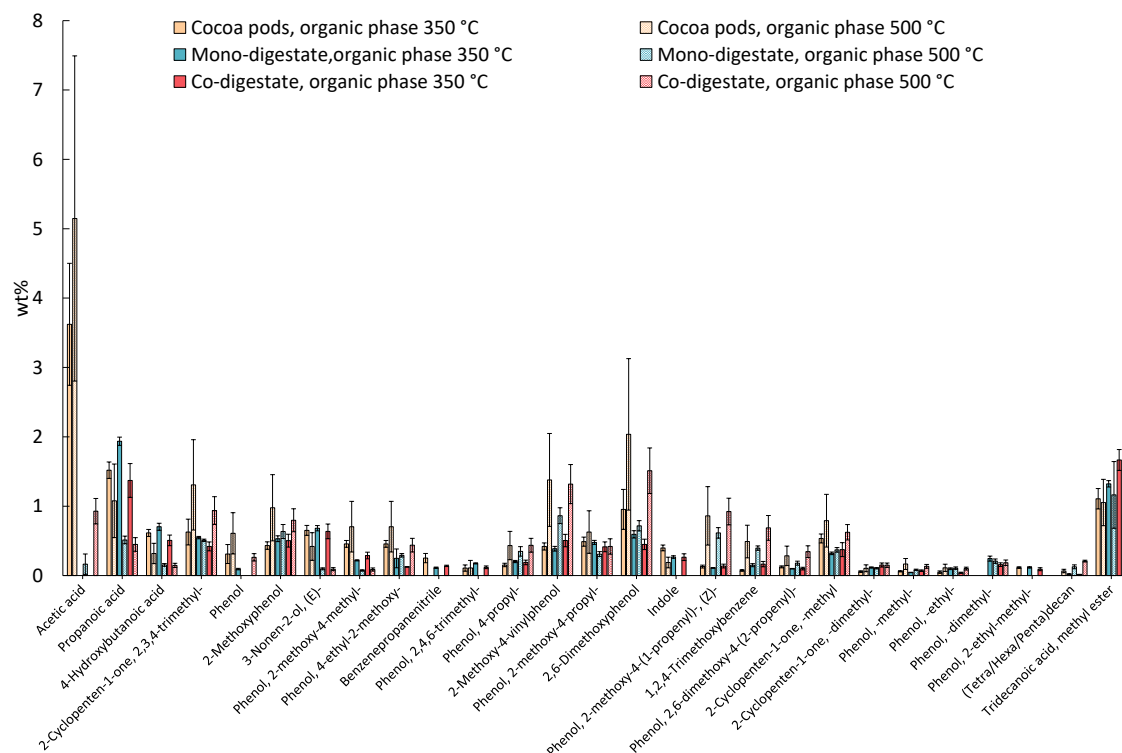

Figure C.2: Individual compounds in pyrolysis liquids in wt.% on liquid-basis, determined through GC-MS analysis.

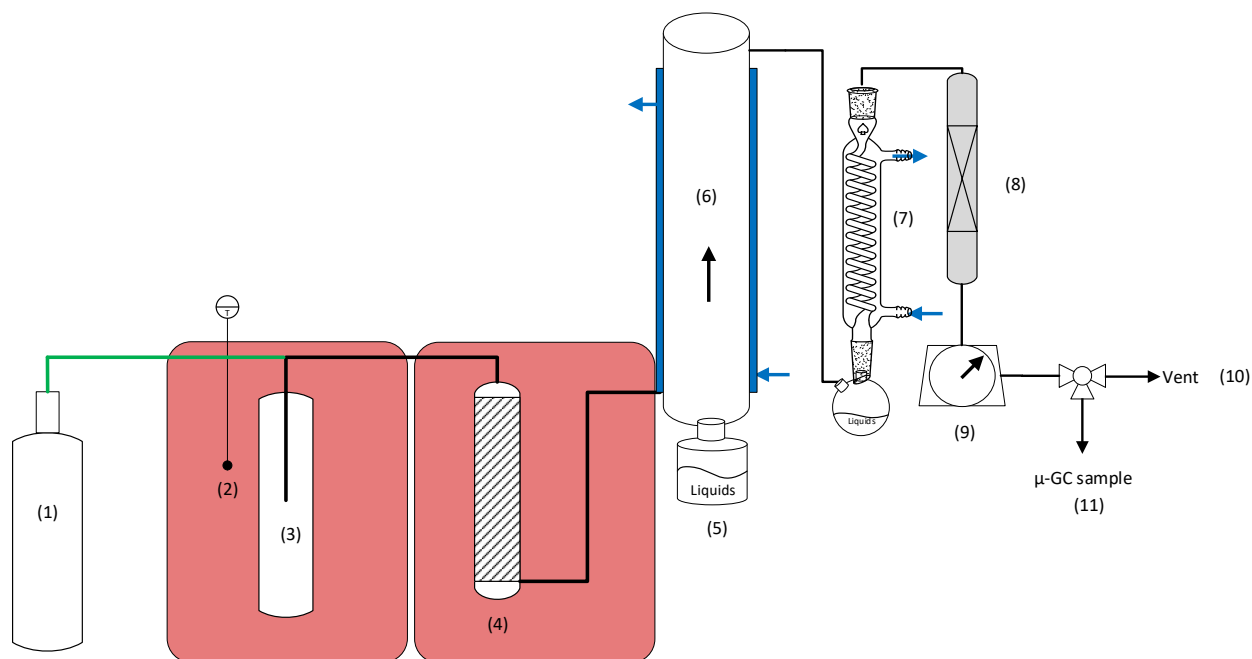

Figure D.3: Scheme of the pyrolysis setup: (1) nitrogen tank; (2) thermocouples; (3) fixed-bed reactor vessel; (4) knock-out vessel; (5) liquid collection vessel; (6) electrostatic precipitator (ESP); (7) glass condenser; (8) cotton wool filter; (9) gas meter; (10) exhaust system and (11)  $\mu$ -GC sample line.

## Appendix D. Pyrolysis set-up

### References

Mohabeer, C., Abdelouahed, L., Marcotte, S., Taouk, B., 2017. Comparative analysis of pyrolytic liquid products of beech wood, flax shives and woody biomass components. *Journal of Analytical and Applied Pyrolysis* 127, 269 – 277. doi:<https://doi.org/10.1016/j.jaap.2017.07.025>.
